# Supplementary material
Source: publisher figshare collection journal article supplement (https://sage.figshare.com/ndownloader/files/14230325)

Suppl.Fig1 **Flowchart showing participant selection process according to STROBE guidelines**

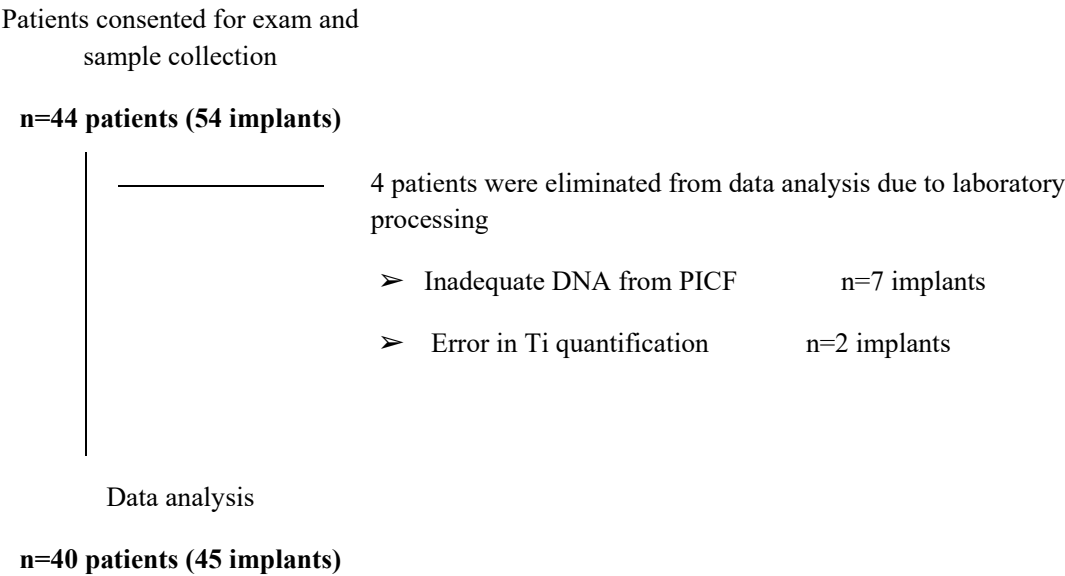

Supplement: Supplementary file 1 [file 14230325]
